# Supplementary material for: Concentration quenching inhibition and fluorescence enhancement in Eu 3+ -doped molybdate red phosphors with two-phase mixing
Source: Royal Society of Chemistry journal article supplement (doi:10.1039/d3ra05873e), 2023-01-01
Supplement: d3ra05873e1.pdf [file d3ra05873e1.pdf]

## *Supplementary Information*

### **Concentration Quenching Inhibition and Fluorescence Enhancement in Eu<sup>3+</sup>-doped Molybdate Red Phosphors with Two-phase Mixing**

Shuanglai Liu <sup>ab</sup>, Yimin Yan <sup>b</sup>, Xiaohan Liu <sup>b</sup>, Zheqian Cui <sup>b</sup>, Shiheng Jia <sup>b</sup>, Yiwen

Xing <sup>b</sup>, Shuang Guo <sup>b</sup>, Bao Wang <sup>b</sup>, Yunfeng Wang <sup>b\*</sup>

*<sup>a</sup> School of Physics and Electronic Engineering, Zhengzhou University of Light  
Industry, Zhengzhou 450000, P. R. China.*

*<sup>b</sup> School of Information Engineering, Nanyang Institute of Technology,  
Nanyang 473004, P. R. China.*

\* Corresponding author. wangyunfeng@nyist.edu.cn

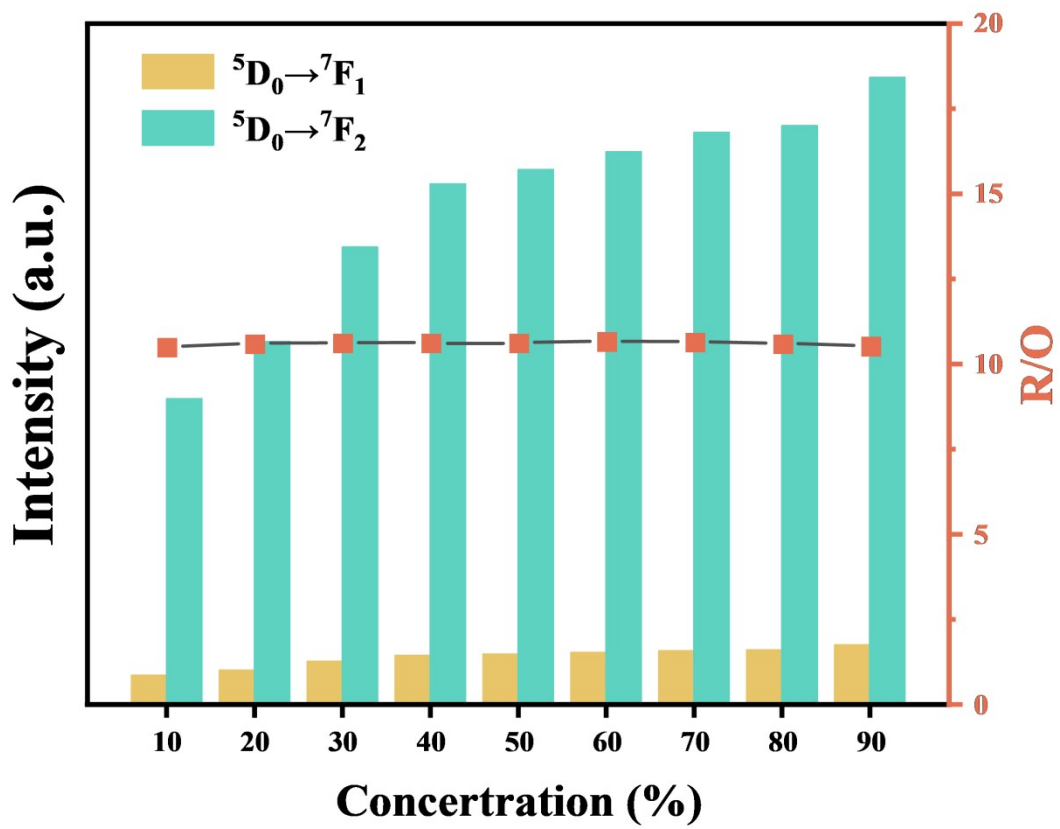

**Fig. S1.** Integrated emission intensity of NIMO: $x\text{Eu}^{3+}$  and the ratios of  ${}^5D_0\text{-}{}^7F_2 / {}^5D_0\text{-}{}^7F_1$  (R/O) with different  $\text{Eu}^{3+}$  doping concentrations.

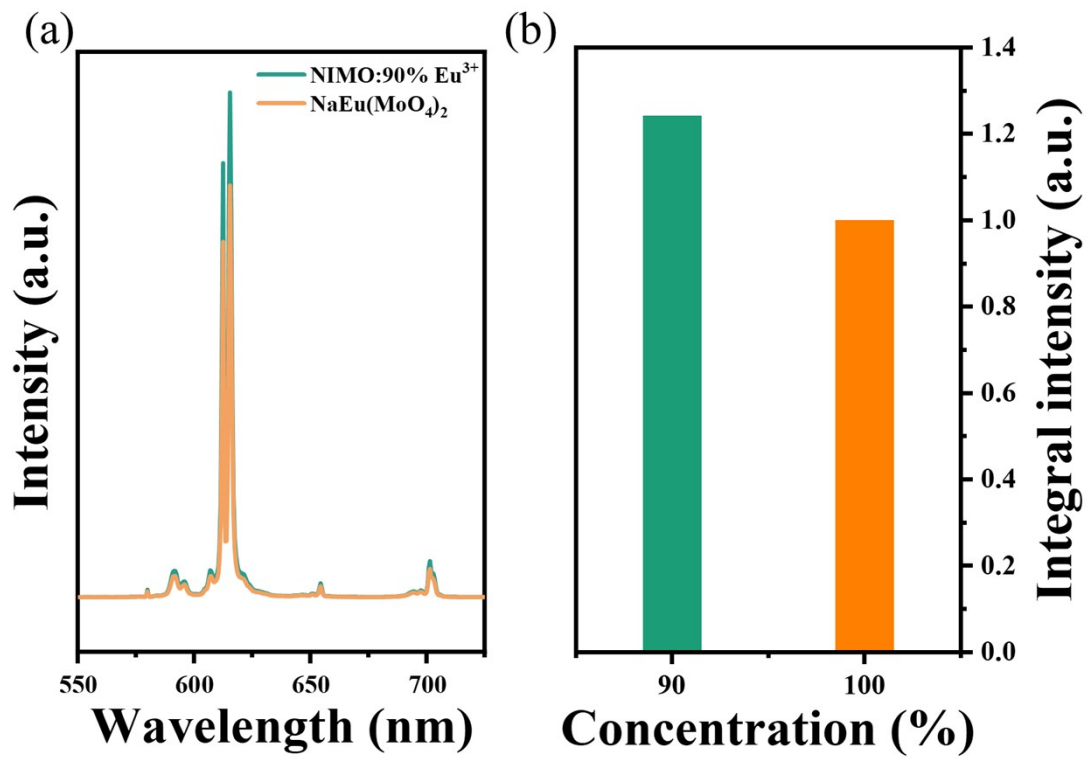

**Fig. S2.** (a) Comparison of PL spectra between NIMO:90%Eu<sup>3+</sup> and NEMO. (b) integrated PL intensity of NIMO:90%Eu<sup>3+</sup> and NEMO.

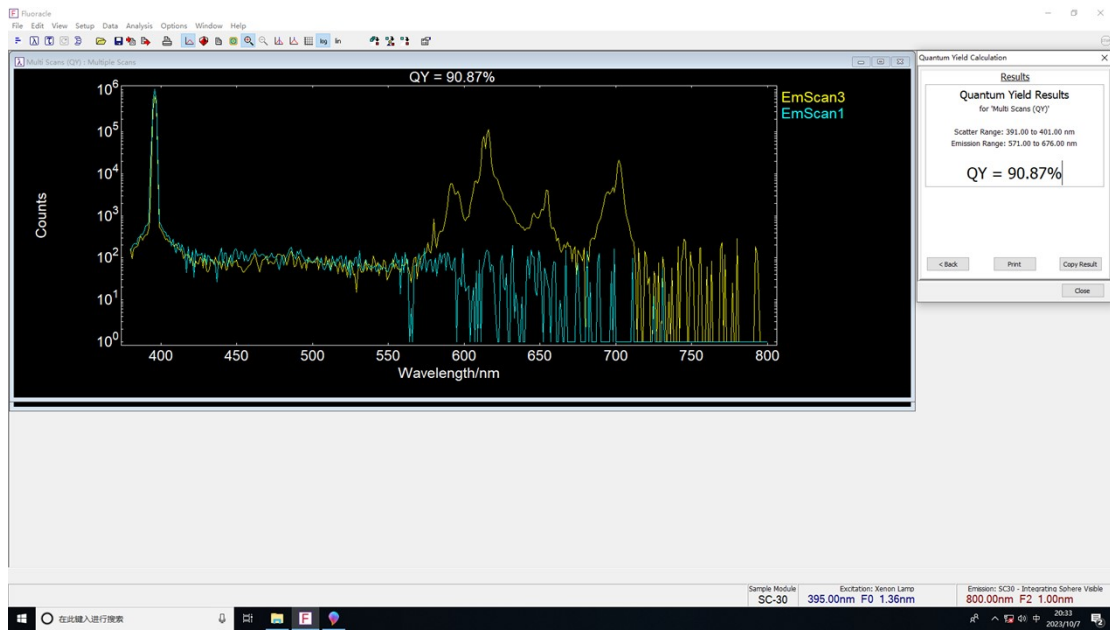

**Fig. S3.** Absolute quantum yield of NIMO:90%Eu<sup>3+</sup> phosphor with the excitation wavelength of 395nm

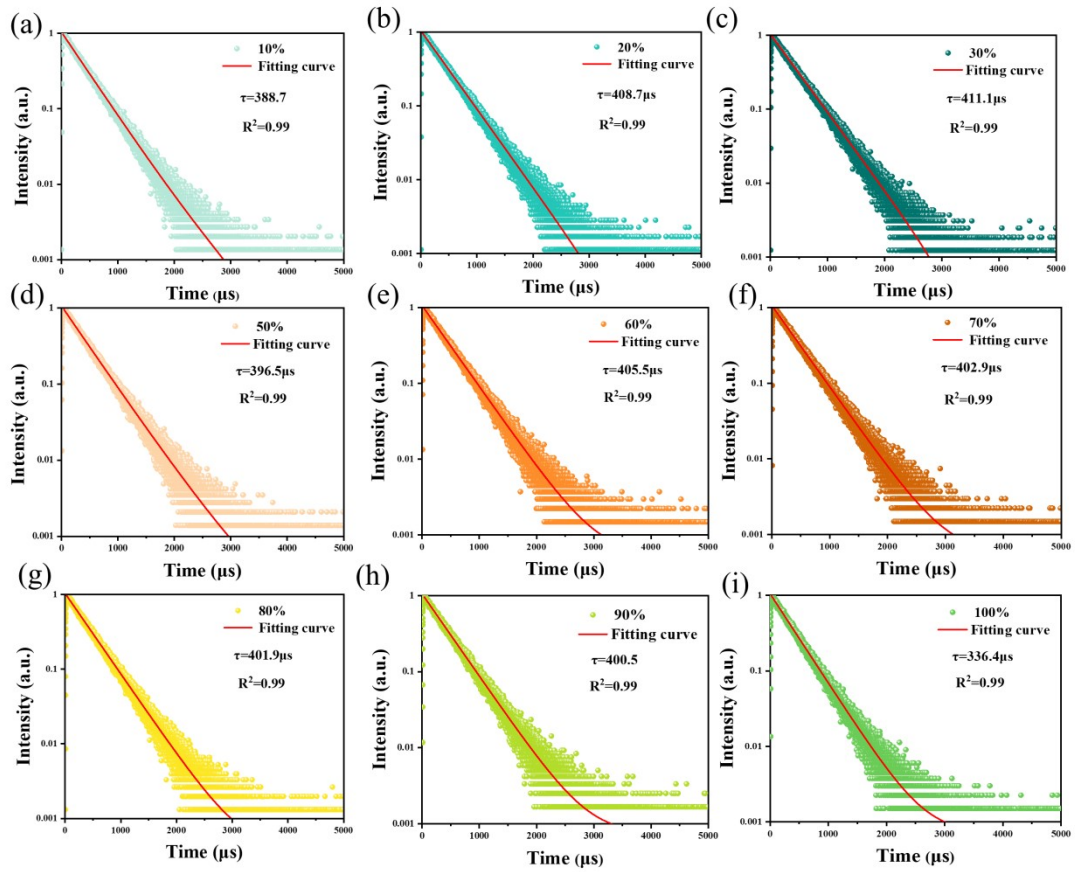

**Fig. S4.** Fluorescence decay curves and fitting lines of  $\text{NaIn}(\text{MoO}_4)_2:x\% \text{Eu}^{3+}$  with different  $\text{Eu}^{3+}$  doping concentrations.

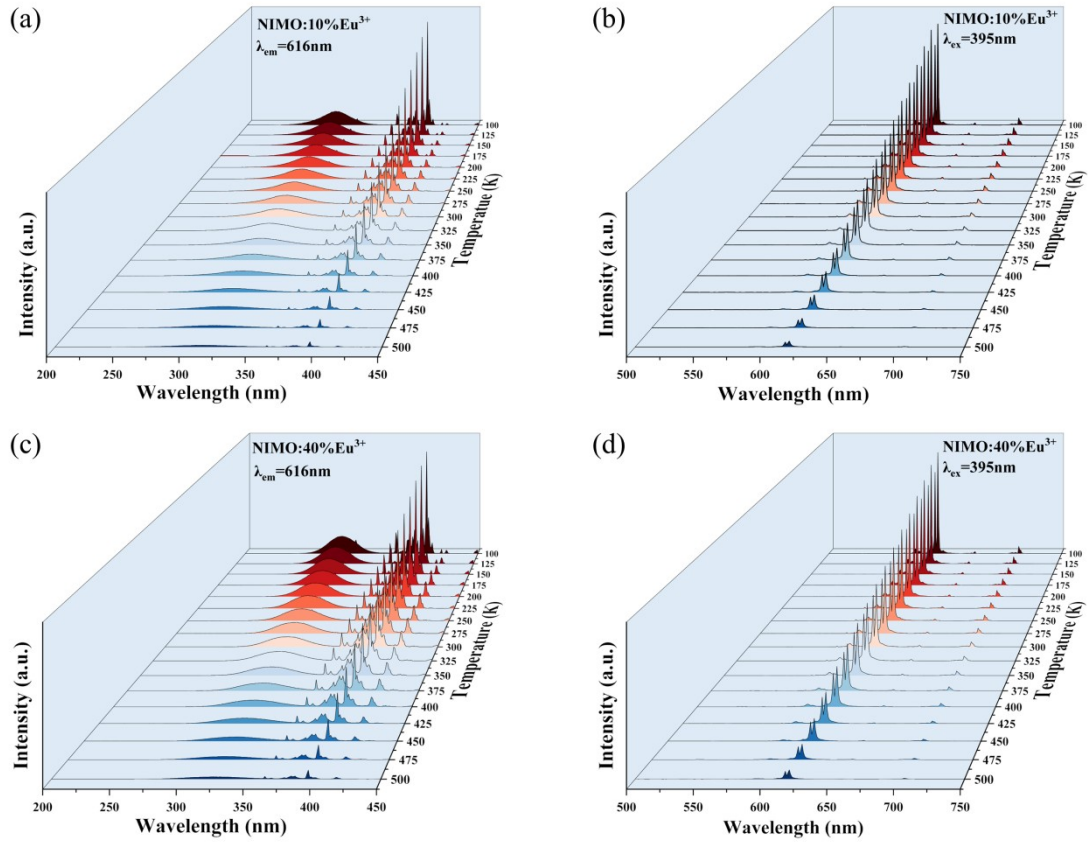

**Fig. S5.** (a) PL and (b) PLE spectra of  $\text{NaIn}(\text{MoO}_4)_2:10\%\text{Eu}^{3+}$  with varying temperature ranging from 100 to 500K. (c) PL and (d) PLE spectra of  $\text{NaIn}(\text{MoO}_4)_2:40\%\text{Eu}^{3+}$  with varying temperature ranging from 100 to 500K.
